# Supplementary material
Source: HighWire-hosted journal article supplement (https://cmajopen.ca/highwire/filestream/84472/field_highwire_adjunct_files/1/2020-0071-2-at.pdf)
Supplement: 2020-0071-2-at.pdf [file 2020-0071-2-at.pdf]

## Appendix 2 (as supplied by the authors): Pre- and postimplementation opioid prescriptions

| Supplemental Table S1: Pre-Intervention Opioid Prescriptions (November 1, 2015 - April 30, 2016) |                 |               |                          |               |              |              |              |                                |                   |                                                   |                               |
|--------------------------------------------------------------------------------------------------|-----------------|---------------|--------------------------|---------------|--------------|--------------|--------------|--------------------------------|-------------------|---------------------------------------------------|-------------------------------|
| Physician Number                                                                                 | Hours Worked    | Patients Seen | Fentanyl patch (mg MEQ*) | Hydromorphone |              | Morphine     |              | Oxycodone + Acetaminophen Tabs |                   | Acetaminophen + Caffeine + Codeine Tabs (mg MEQ*) | Total Morphine Eq. Prescribed |
|                                                                                                  |                 |               |                          | IR (mg MEQ*)  | ER (mg MEQ*) | IR (mg)      | SR (mg)      | Acetaminophen (mg MEQ*)        | Codeine (mg MEQ*) |                                                   |                               |
| 1                                                                                                | 523.75          | 846           | 12500                    | 6310          | 1185         | 834          | 0            | 0                              | 0                 | 3397                                              | 24226                         |
| 2                                                                                                | 472.00          | 694           | 0                        | 4775          | 1020         | 250          | 0            | 0                              | 0                 | 180                                               | 6225                          |
| 3                                                                                                | 561.75          | 780           | 0                        | 7340          | 0            | 500          | 0            | 0                              | 0                 | 2304                                              | 10144                         |
| 4                                                                                                | 504.75          | 1001          | 0                        | 9600          | 840          | 150          | 0            | 0                              | 0                 | 3060                                              | 13650                         |
| 5                                                                                                | 774.25          | 1548          | 0                        | 22135         | 2025         | 0            | 0            | 75                             | 0                 | 1980                                              | 26215                         |
| 6                                                                                                | 500.25          | 976           | 0                        | 2525          | 630          | 1025         | 0            | 0                              | 0                 | 855                                               | 5035                          |
| 7                                                                                                | 598.00          | 1264          | 0                        | 16070         | 4860         | 275          | 0            | 225                            | 0                 | 4073                                              | 25503                         |
| 8                                                                                                | 358.50          | 627           | 0                        | 4065          | 0            | 325          | 0            | 0                              | 0                 | 1395                                              | 5785                          |
| 9                                                                                                | 613.25          | 990           | 0                        | 9020          | 2160         | 200          | 0            | 150                            | 0                 | 1931                                              | 13461                         |
| 10                                                                                               | 767.50          | 1528          | 0                        | 5855          | 0            | 0            | 0            | 0                              | 0                 | 405                                               | 6260                          |
| 11                                                                                               | 583.75          | 1282          | 125000                   | 5400          | 450          | 3070         | 2970         | 0                              | 0                 | 3501                                              | 140391                        |
| 12                                                                                               | 531.00          | 1047          | 0                        | 2710          | 120          | 300          | 120          | 0                              | 0                 | 279                                               | 3529                          |
| 13                                                                                               | 604.00          | 966           | 0                        | 4875          | 2700         | 400          | 0            | 0                              | 0                 | 270                                               | 8245                          |
| 14                                                                                               | 760.25          | 1365          | 10000                    | 8550          | 4260         | 1250         | 300          | 0                              | 0                 | 1197                                              | 25557                         |
| 15                                                                                               | 587.50          | 974           | 0                        | 8190          | 1740         | 0            | 5450         | 0                              | 0                 | 1557                                              | 16937                         |
| 16                                                                                               | 656.75          | 1092          | 0                        | 6995          | 0            | 0            | 0            | 0                              | 0                 | 2003                                              | 8998                          |
| 17                                                                                               | 340.50          | 687           | 0                        | 8335          | 0            | 300          | 0            | 0                              | 0                 | 1791                                              | 10426                         |
| 18                                                                                               | 502.00          | 1162          | 0                        | 9650          | 0            | 300          | 0            | 0                              | 0                 | 3375                                              | 13375                         |
| 19                                                                                               | 195.00          | 372           | 0                        | 500           | 0            | 100          | 0            | 0                              | 0                 | 135                                               | 735                           |
| 20                                                                                               | 378.75          | 866           | 0                        | 2010          | 180          | 0            | 0            | 0                              | 0                 | 392                                               | 2582                          |
| 21                                                                                               | 530.50          | 1049          | 0                        | 1950          | 720          | 3075         | 0            | 0                              | 0                 | 2745                                              | 8490                          |
| 22                                                                                               | 370.00          | 604           | 0                        | 2430          | 0            | 200          | 0            | 0                              | 0                 | 360                                               | 2990                          |
| 23                                                                                               | 966.50          | 2125          | 0                        | 43830         | 600          | 180          | 0            | 0                              | 0                 | 720                                               | 45330                         |
| 24                                                                                               | 136.00          | 244           | 0                        | 1050          | 315          | 0            | 0            | 0                              | 0                 | 0                                                 | 1365                          |
| 25                                                                                               | 711.75          | 1039          | 0                        | 8400          | 450          | 620          | 1040         | 0                              | 0                 | 2682                                              | 13192                         |
| 26                                                                                               | 558.00          | 1050          | 0                        | 2250          | 0            | 0            | 0            | 0                              | 0                 | 90                                                | 2340                          |
| 27                                                                                               | 530.25          | 1303          | 0                        | 5925          | 150          | 0            | 0            | 0                              | 0                 | 810                                               | 6885                          |
| 28                                                                                               | 610.00          | 944           | 0                        | 5465          | 270          | 345          | 900          | 0                              | 0                 | 1283                                              | 8263                          |
| 29                                                                                               | 399.00          | 698           | 0                        | 1900          | 0            | 0            | 0            | 0                              | 0                 | 450                                               | 2350                          |
| 30                                                                                               | 319.50          | 665           | 0                        | 4140          | 0            | 300          | 900          | 0                              | 0                 | 0                                                 | 5340                          |
| 31                                                                                               | 836.00          | 937           | 0                        | 15610         | 6240         | 640          | 100          | 1305                           | 0                 | 8046                                              | 31941                         |
| 32                                                                                               | 381.50          | 643           | 0                        | 1525          | 1440         | 100          | 0            | 0                              | 0                 | 783                                               | 3843                          |
| <b>Total</b>                                                                                     | <b>17162.50</b> | <b>31368</b>  | <b>147500</b>            | <b>239385</b> | <b>32355</b> | <b>14739</b> | <b>11780</b> | <b>1755</b>                    | <b>0</b>          | <b>52049</b>                                      | <b>499608</b>                 |

\*Calculated in milligrams of Morphine Equivalents

**Supplemental Table S2: Post-Intervention Opioid Prescriptions (November 1, 2016 - April 30, 2017)**

| Physician Number | Hours Worked    | Patients Seen | Fentanyl patch (mg MEQ*) | Hydromorphone |              | Morphine     |             | Oxycodone + Acetaminophen (mg MEQ*) | Tabs | Acetaminophen + Caffeine + Codeine Tabs (mg MEQ*) | Total Morphine Eq. Prescribed |
|------------------|-----------------|---------------|--------------------------|---------------|--------------|--------------|-------------|-------------------------------------|------|---------------------------------------------------|-------------------------------|
|                  |                 |               |                          | IR (mg MEQ*)  | ER (mg MEQ*) | IR (mg)      | SR (mg)     |                                     |      |                                                   |                               |
| 1                | 525.75          | 778           |                          | 6240          | 2070         | 200          | 0           | 0                                   |      | 1625                                              | 10135                         |
| 2                | 361.75          | 580           | 0                        | 2300          | 0            | 200          | 0           | 0                                   |      | 225                                               | 2725                          |
| 3                | 401.25          | 586           | 0                        | 2600          | 0            | 0            | 0           | 0                                   |      | 1166                                              | 3766                          |
| 4                | 546.50          | 1073          | 25000                    | 2700          | 0            | 300          | 0           | 0                                   |      | 1845                                              | 29845                         |
| 5                | 750.00          | 1534          | 0                        | 14975         | 480          | 341          | 0           | 0                                   |      | 1440                                              | 17236                         |
| 6                | 544.25          | 1111          | 0                        | 2605          | 540          | 350          | 0           | 0                                   |      | 5040                                              | 8535                          |
| 7                | 554.75          | 1134          | 0                        | 9335          | 2010         | 550          | 620         | 0                                   |      | 2273                                              | 14788                         |
| 8                | 358.00          | 639           | 0                        | 1315          | 0            | 75           | 0           | 0                                   |      | 1481                                              | 2871                          |
| 9                | 517.25          | 791           | 100000                   | 5800          | 900          | 500          | 0           | 150                                 |      | 1035                                              | 108385                        |
| 10               | 757.50          | 1590          | 0                        | 6700          | 0            | 0            | 0           | 450                                 |      | 90                                                | 7240                          |
| 11               | 629.25          | 1320          | 12500                    | 3200          | 420          | 2400         | 0           | 0                                   |      | 2070                                              | 20590                         |
| 12               | 420.25          | 736           | 0                        | 715           | 45           | 1220         | 200         | 0                                   |      | 180                                               | 2360                          |
| 13               | 500.00          | 724           | 0                        | 7065          | 420          | 400          | 0           | 0                                   |      | 756                                               | 8641                          |
| 14               | 735.00          | 1307          | 0                        | 6840          | 0            | 245          | 300         | 0                                   |      | 810                                               | 8195                          |
| 15               | 546.75          | 937           | 0                        | 1830          | 2640         | 200          | 0           | 0                                   |      | 63                                                | 4733                          |
| 16               | 583.25          | 969           | 30000                    | 3765          | 675          | 700          | 0           | 0                                   |      | 1440                                              | 36580                         |
| 17               | 265.75          | 525           | 0                        | 4300          | 1620         | 300          | 0           | 0                                   |      | 1440                                              | 7660                          |
| 18               | 235.75          | 528           | 0                        | 2800          | 0            | 0            | 0           | 225                                 |      | 2160                                              | 5185                          |
| 19               | 166.25          | 298           | 0                        | 250           | 0            | 100          | 0           | 0                                   |      | 50                                                | 400                           |
| 20               | 311.25          | 691           | 0                        | 1475          | 0            | 0            | 0           | 0                                   |      | 135                                               | 1610                          |
| 21               | 496.50          | 986           | 0                        | 1415          | 0            | 1675         | 0           | 0                                   |      | 1215                                              | 4305                          |
| 22               | 343.75          | 521           | 0                        | 3250          | 0            | 0            | 0           | 0                                   |      | 945                                               | 4195                          |
| 23               | 783.25          | 1662          | 0                        | 19235         | 900          | 0            | 0           | 150                                 |      | 360                                               | 20645                         |
| 24               | 87.25           | 136           | 0                        | 100           | 0            | 0            | 0           | 0                                   |      | 0                                                 | 100                           |
| 25               | 791.25          | 1159          | 0                        | 6375          | 840          | 850          | 300         | 0                                   |      | 4226                                              | 12591                         |
| 26               | 536.00          | 1022          | 0                        | 2050          | 0            | 100          | 0           | 0                                   |      | 158                                               | 2308                          |
| 27               | 530.50          | 1202          | 0                        | 5375          | 720          | 100          | 0           | 0                                   |      | 743                                               | 6938                          |
| 28               | 552.25          | 874           | 0                        | 3560          | 0            | 715          | 0           | 225                                 |      | 68                                                | 4568                          |
| 29               | 410.00          | 753           | 0                        | 2745          | 0            | 125          | 0           | 0                                   |      | 64                                                | 2934                          |
| 30               | 272.00          | 576           | 0                        | 3225          | 0            | 0            | 0           | 0                                   |      | 198                                               | 3423                          |
| 31               | 993.25          | 2272          | 17500                    | 17455         | 3000         | 300          | 0           | 255                                 |      | 13122                                             | 51632                         |
| 32               | 309.75          | 481           | 0                        | 620           | 0            | 175          | 1820        | 0                                   |      | 378                                               | 2993                          |
| <b>Total</b>     | <b>15816.25</b> | <b>29495</b>  | <b>185000</b>            | <b>152215</b> | <b>17280</b> | <b>12121</b> | <b>3240</b> | <b>1455</b>                         |      | <b>46801</b>                                      | <b>418112</b>                 |

\*Calculated in milligrams of Morphine Equivalents
